# Supplementary material
Source: PubMed Central journal article supplement (PMC1143078)
Supplement: plntcell_tpc.105.031419_3.pdf [file plntcell_tpc.105.031419_3.pdf]

### Supplemental Figure 3

Aoki et al. (2005)

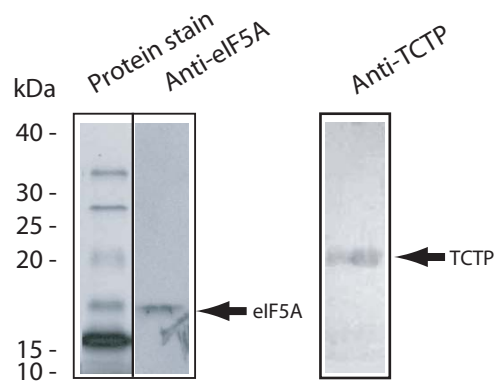

**Supplemental Figure 3.** Immunoblotting of CmPP16-interacting proteins.

Co-immunoprecipitated protein from FD was silver-stained (Protein stain), or immunoblotted with anti-eIF5A antiserum (Anti-eIF5A, gift from Dr. Chris Kuhlenmeier, University of Berne), or anti-human histamine releasing factor antibody (HRF (L-20): sc-20427, Santa Cruz Biotechnology, Inc., Santa Cruz, CA) (Anti-TCTP).

This result provided evidence supporting that 17 kDa and 21 kDa co-precipitated proteins are eIF5A and TCTP, respectively. Reproducible results were obtained from Remix and FDwr16 with CmPP16-2 addition.
