# Supplementary material
Source: PubMed Central journal article supplement (PMC1143078)
Supplement: plntcell_tpc.105.031419_5.pdf [file plntcell_tpc.105.031419_5.pdf]

## Supplemental Table 1

Peptide analysis of systemically translocated BQCmPP tracer proteins.

| Spot Series | Identity | Observed Mass(m/z) <sup>c</sup> | Theoretical Mass(m/z) <sup>c</sup> | Assigned Peptide                                                      |
|-------------|----------|---------------------------------|------------------------------------|-----------------------------------------------------------------------|
| BQCmPP16    | CmPP16-2 | 779.47 <sup>f</sup>             | 570.33                             | 122-125 <u>IYFK</u>                                                   |
|             |          | 1068.65                         | 1068.58                            | 15- 24 <u>GLQALDPLNK</u>                                              |
|             |          | 1911.77                         | 1911.99                            | 106-121 GWSELPPRMYQVLAHK                                              |
|             |          | 1240.61                         | 1240.60                            | 46- 56 <u>NAGDPDWNEK</u>                                              |
|             |          | 1306.46                         | 1306.67                            | 25- 35 PIDPYAEINFK                                                    |
|             |          | 1728.51                         | 1728.71 <sup>a</sup>               | 2-14 (N-biotin)GMGMMEVHLISGK                                          |
|             |          | 1877.93                         | 1877.82                            | 76- 92 VMDHDAIDGDDYIGDVK                                              |
|             |          | 1925.63                         | 1925.98                            | 59- 75 FLVEYPGSGGDFHILFK                                              |
|             |          | 2540.80                         | 2540.50 <sup>a</sup>               | 57- 75 <u>EK(-biotin)</u> <u>FLVEYPGSGGDFHILFK</u>                    |
| BQCmPP19    | CmPP16-1 | 1092.60                         | 1092.58                            | 15- 24 GLQAHDPLNK                                                     |
|             |          | 1240.89                         | 1240.60                            | 46- 56 <u>NAGPNPLWDEK</u>                                             |
|             |          | 1306.59                         | 1306.67                            | 25- 35 PIDPYAEINFK                                                    |
|             |          | 1562.90                         | 1562.60 <sup>b</sup>               | 136-150 <u>LQGGGC(-CAM)GGC(-CAM)</u> <u>NPWEN</u>                     |
|             |          | 1728.96                         | 1728.71 <sup>a</sup>               | 2-14 (N-biotin)GMGMMEVHLISGK                                          |
|             |          | 1793.96                         | 1793.87 <sup>a</sup>               | 93-105 IDVK(-biotin)NLLAEGVRK                                         |
|             |          | 1877.99                         | 1877.82                            | 76- 92 VMDHDAIDGDDYIGDVK                                              |
|             |          | 1897.98                         | 1897.95                            | 59-75 FLAEYPGSGGDFHILFK                                               |
|             |          | 2512.06                         | 2512.11 <sup>a</sup>               | 57-75 <u>EK(-biotin)</u> <u>FLAEYPGSGGDFHILFK</u>                     |
| BQCmPP48    | SLW1     | 1470.77                         | 1470.77 <sup>d</sup>               | 216-228 <sup>e</sup> <u>TYGHLFHSGLPNK</u>                             |
|             | ortholog | 2375.99                         | 2376.30 <sup>d</sup>               | 229-249 <sup>e</sup> <u>AINALELAMDALKPIQLNFYK</u>                     |
|             |          | 2822.18                         | 2821.46 <sup>d</sup>               | 44- 69 <sup>e</sup> <u>EDLVGAHVREVLDPYSTENGGPLIIK</u>                 |
|             |          | 2936.31                         | 2936.43 <sup>b d</sup>             | 189-215 <sup>e</sup> <u>GGPLYWVDTADSQPC(-CAM)</u> <u>IGTGGTIPWFIK</u> |

Underlined bold letters indicate amino acid sequences obtained by Edman sequencing. Double-underlined letters indicate amino acid substitution from database sequences (accession number Q9ZT47 and Q9ZT46 for CmPP16-1 and CmPP16-2, respectively).

<sup>a</sup> predicted mass of biotinylated peptide. Biotinylation adds m/z=339 to theoretical mass.

<sup>b</sup> predicted mass of cysteine-modified peptide. <sup>c</sup> monoisotopic mass value. <sup>d</sup> predicted

mass values based on actual sequences. <sup>e</sup> corresponding region of *Cucurbita pepo* SLW1 (AAG25896). <sup>f</sup> modification and/or amino acid substitution was unidentified. Abbreviations of modification: (N-biotin), N-terminal biotinylation; (-biotin), biotinylation; C(-CAM), carboxymethyl cystein.
