# Supplementary material
Source: PubMed Central journal article supplement (PMC1143078)
Supplement: plntcell_tpc.105.031419_6.pdf [file plntcell_tpc.105.031419_6.pdf]

## Supplemental Table 2

Identification of CmPP16-interacting proteins.

| Band | Interaction | Sequence Call                    | Protein Match                       |                       |
|------|-------------|----------------------------------|-------------------------------------|-----------------------|
|      |             |                                  | Protein (ID)                        | Sequence Matches      |
| 3    | CmPP16-1    | <b><u>DGYIV</u></b>              | eIF-5A <sup>a</sup> (AAK12100)      | 29 GGYIV 33           |
|      | CmPP16-2    | <b><u>TYPPTAGxIR</u></b>         | (NP 173985.1)                       | 18 TYPQSAGNIR 27      |
|      |             | <b><u>DDLRLPTDDNLL</u></b>       | (CAA45104)                          | 113 DDLRLPTDDNLL 124  |
| 4B   | CmPP16-1    | <b><u>TFNIK</u></b>              | Skp1/Ask1 <sup>b</sup> (AAT09201.1) | 149 TFNIK 153         |
|      |             | <b><u>QGxGEIFEVxEVALxGQT</u></b> | (NP 565123.1)                       | 13 GESFEVEEVALESQT 28 |
| 4A   | CmPP16-1    | <b><u>IALYGTTVEExDM</u></b>      | Expressed (AAM10337.1)              | 155 IALYGSTVETDMD 167 |
|      |             | <b><u>FGxVRSLTIFI</u></b>        | (At3g04780) (AAM10337.1)            | 130 FQNVRSLTIFI 140   |
| 5    | CmPP16-1    | <b><u>QFITYMK</u></b>            | TCTP <sup>c</sup> (AAD10032.1)      | 86 QFVITYMK 92        |
|      | CmPP16-2    | <b><u>RYIK</u></b>               | (CAA10048.1)                        | 92 RYIK 95            |
|      |             | <b><u>VVDIVDTFRLQE</u></b>       | (AAD42049.1)                        | 67 VVDIVDTFRLQE 78    |

Band numbers are indicated in Figure 5C, 5D and 6C. Underlined bold letters indicate amino acid sequences obtained by Edman sequencing. “x” indicates amino acid residue that could not be determined. <sup>a</sup> eIF-5A, eukaryotic translation initiation factor 5A; <sup>b</sup> Skp1/Ask1, E3 ubiquitin ligase SCF complex subunit; <sup>c</sup> TCTP, translationally-controlled tumor-associated protein.
